# Supplementary material for: Tailored mesoporous γ-WO3 nanoplates: unraveling their potential for highly sensitive NH3 detection and efficient photocatalysis
Source: Royal Society of Chemistry journal article supplement (doi:10.1039/d3cp03353h), 2023-01-01
Supplement: d3cp03353h1.pdf [file d3cp03353h1.pdf]

## Tailored Mesoporous $\gamma$ -WO<sub>3</sub> nanoplates: Unraveling their potential for highly sensitive NH<sub>3</sub> detection and Efficient Photocatalysis

Shubham Tripathi\*<sup>1</sup>, Jyoti Yadav<sup>1,2</sup>, Atul Kumar<sup>1</sup>, Raj Kamal Yadav<sup>3</sup>, Pratima Chauhan<sup>1</sup>,  
Ravindra Kumar Rawat<sup>1</sup>, Satyam Tripathi<sup>1,4</sup>

<sup>1</sup>Advance Nanomaterial Research Laboratory, Department of Physics, University of Allahabad, Prayagraj, Uttar Pradesh, India-211002

<sup>2</sup>Centre of Environmental Science, IIDS, University of Allahabad, Prayagraj, Uttar Pradesh, India-211002

<sup>3</sup>SGN Government Post Graduate College, Muhammadabad Gohna, Uttar Pradesh, India-276403

<sup>4</sup>Centre of Material Sciences, IIDS, University of Allahabad, Prayagraj, Uttar Pradesh, India-211002

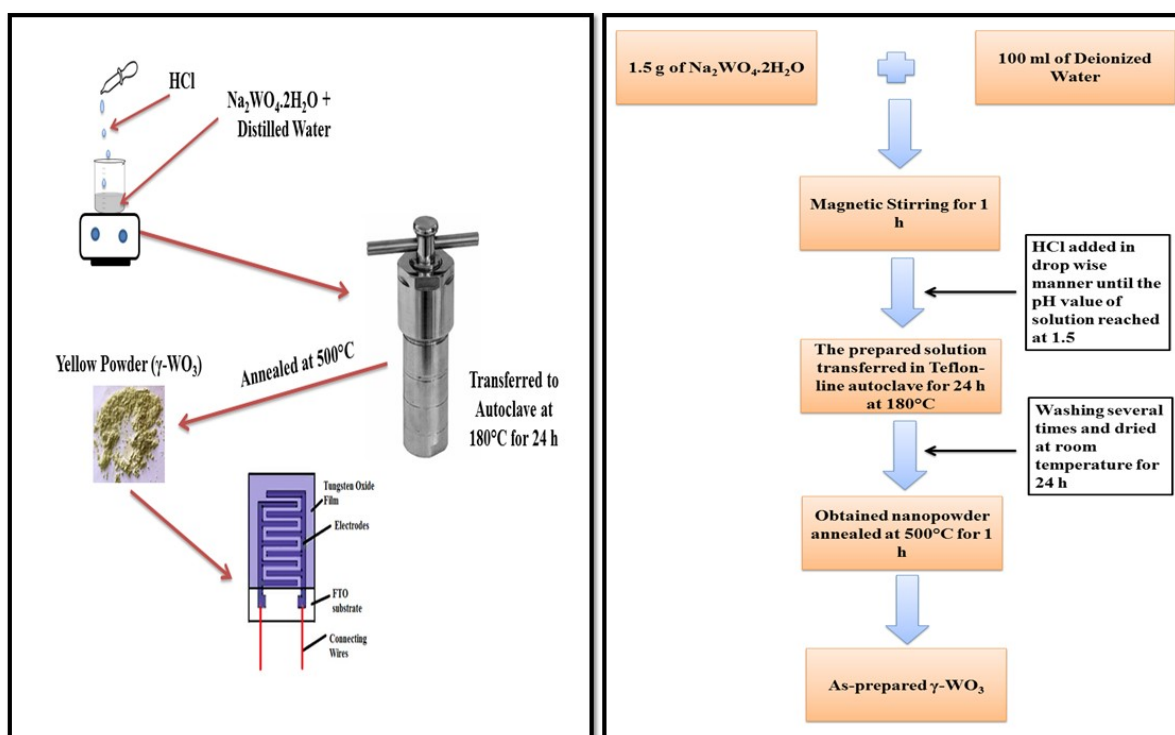

Fig.S1 Synthesis process and sensing film deposition on electrode (left), Schematic flow chart of synthesis of  $\gamma$ -WO<sub>3</sub> (right).

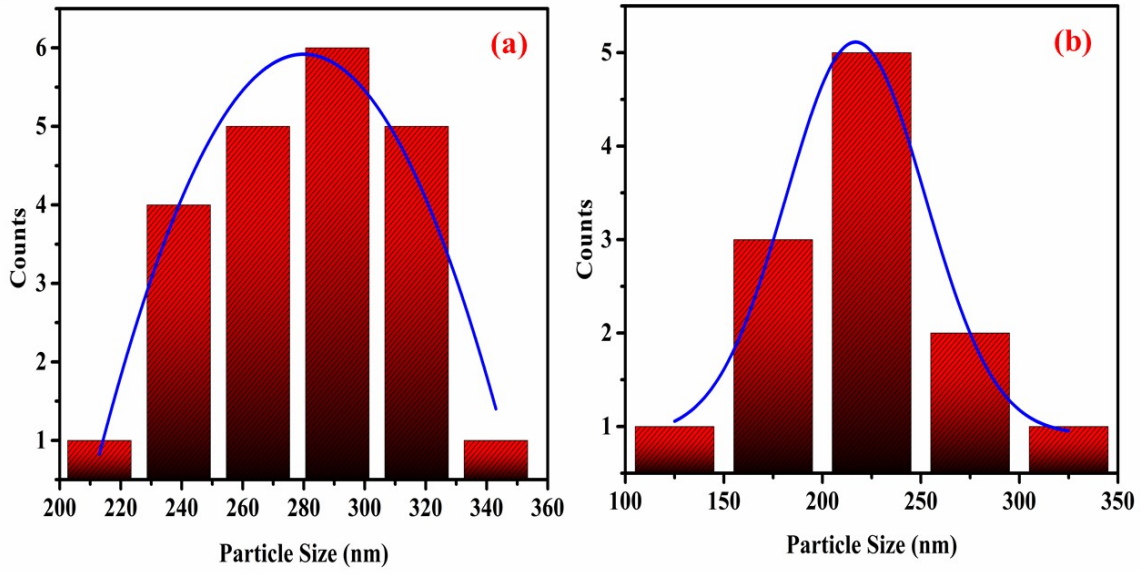

Fig.S2 Bar chart for average particle size distribution for sensing film of  $\gamma$ - $\text{WO}_3$  (a) FE-SEM (b) HR-TEM micrographs

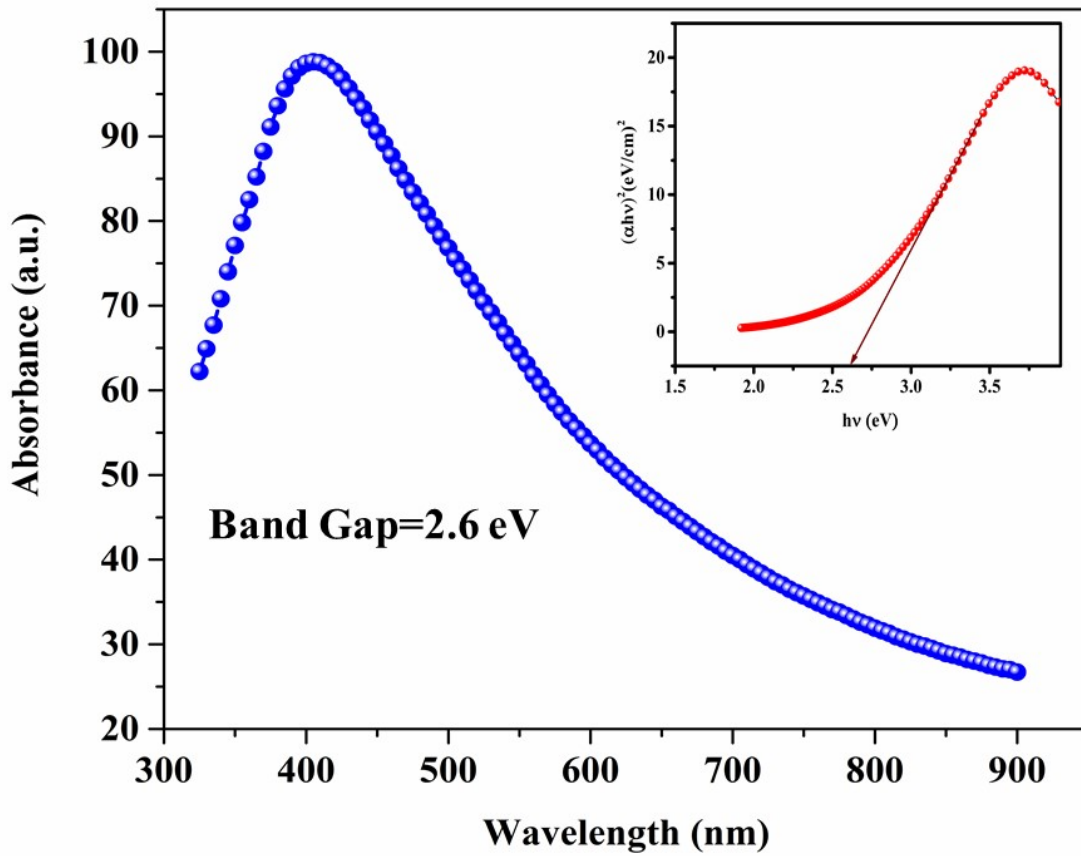

Fig.S3 UV- Visible spectrum and Tauc plot

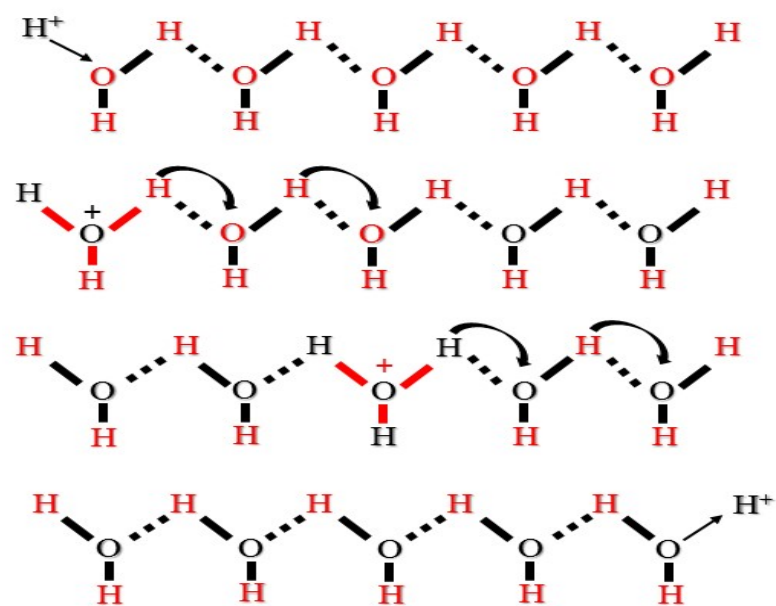

Fig.S4 Grotthuss mechanism
